# Supplementary material for: The interaction between language and working memory: a systematic review of fMRI studies in the past two decades
Source: PubMed Central journal article supplement (PMC7815476; doi:10.3934/neuroscience.2021001), 2020-11-16
Supplement: neurosci-08-01-001-s001.pdf [file neurosci-08-01-001-s001.pdf]

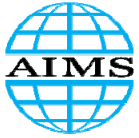

*Review*

**The interaction between language and working memory: a systematic review of fMRI studies in the past two decades**

**Zoha Deldar<sup>1,5,†</sup>, Carlos Gevers-Montoro<sup>1,2,†</sup>, Ali Khatibi<sup>3,4</sup> and Ladan Ghazi-Saidi<sup>5,\*</sup>**

<sup>1</sup> Department of Anatomy, Université du Québec à Trois-Rivières, Trois-Rivières, QC, Canada

<sup>2</sup> Madrid College of Chiropractic, Real Centro Universitario María Cristina, San Lorenzo de El Escorial, Madrid, Spain

<sup>3</sup> Centre of Precision Rehabilitation for Spinal Pain, University of Birmingham, Birmingham, UK

<sup>4</sup> Centre for Human Brain Health, University of Birmingham, Birmingham, UK

<sup>5</sup> Language and Cognition Laboratory, Department of Communication Disorders, College of Education, University of Nebraska at Kearney, USA

† Zoha Deldar and Carlos Gevers-Montoro contributed equally to this work.

\* **Correspondence:** Email: [ghazisaidil2@unk.edu](mailto:ghazisaidil2@unk.edu).

---

**Table S1.** A summary of the magnetic resonance imaging approach and analysis technique employed in the 20 studies included in this review.

| Authors (year)                     | MR Method and Analysis |                   | MRI Analysis                                    |
|------------------------------------|------------------------|-------------------|-------------------------------------------------|
|                                    | MR field strength      | Analysis software |                                                 |
| Buchweitz et al. (2009) [16]       | 3 T                    | SPM2              | Whole-brain                                     |
| Moore et al. (2013) [72]           | 3 T                    | AFNI              | Whole-brain and functional connectivity         |
| Buchweitz et al. (2012) [97]       | 3 T                    | SPM2              | Regions of Interest and functional Connectivity |
| Fiebach et al. (2004) [98]         | 3 T                    | LIPSIA and SPM99  | Whole-brain                                     |
| Mason & Just (2007) [99]           | 1.5 T                  | FIASCO and SPM99  | Whole-brain                                     |
| Rudner et al. (2013) [102]         | 3 T                    | SPM8              | Whole-brain                                     |
| Rudner et al. (2005) [103]         | 1.5 T                  | SPM99             | Whole-brain                                     |
| Newman et al. (2013) [104]         | 3 T                    | SPM8              | Functional connectivity                         |
| Wallentin et al. (2006) [110]      | 3 T                    | SPM2              | Whole-brain                                     |
| Marvel & Desmond (2012) [112]      | 3 T                    | SPM2              | Whole-brain and region of interest              |
| McGettigan et al. (2011) [113]     | 1.5 T                  | SPM5              | Regions of Interest                             |
| Powell et al. (2012) [114]         | 3 T                    | SPM5              | Whole-brain                                     |
| Sahin et al. (2006) [115]          | 3 T                    | FS-FAST           | Whole-brain and region of interest              |
| Meyer et al. (2012) [116]          | 3 T                    | SPM8              | Whole-brain                                     |
| Bonhage et al. (2014) [117]        | 3 T                    | SPM8              | Whole-brain                                     |
| Makuuchi & Friederici (2013) [121] | 3 T                    | SPM8              | Regions of Interest and functional Connectivity |
| Newman et al. (2002) [125]         | 1.5 T                  | FIASCO            | Regions of Interest and functional Connectivity |
| Cooke et al. (2006) [127]          | 1.5 T                  | SPM99             | Regions of Interest and functional Connectivity |
| Tomasi & Volkow (2020) [128]       | 3 T                    | IDL               | Functional connectivity                         |
| Mineroff et al. (2018) [134]       | 3 T                    | SPM5              | Regions of Interest and functional Connectivity |

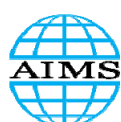

**AIMS Press**

© 2021 the Author(s), licensee AIMS Press. This is an open access article distributed under the terms of the Creative Commons Attribution License (<http://creativecommons.org/licenses/by/4.0>)
